# Supplementary material for: Evidence of SARS-CoV-2 Transcriptional Activity in Cardiomyocytes of COVID-19 Patients without Clinical Signs of Cardiac Involvement
Source: Biomedicines. 2020 Dec 18;8(12):626. doi: 10.3390/biomedicines8120626 (PMC7767122; doi:10.3390/biomedicines8120626)
Supplement: Supplementary file 1 [file biomedicines-08-00626-s001.pdf]

# **Evidence of SARS-CoV-2 transcriptional activity in cardiomyocytes of COVID-19 patients without clinical signs of cardiac involvement**

Gaetano Pietro Bulfamante<sup>1,2\*</sup>, Gianluca Lorenzo Perrucci<sup>3\*</sup>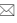, Monica Falleni<sup>1,2</sup>, Elena Sommariva<sup>3</sup>, Delfina Tosi<sup>1</sup>, Carla Martinelli<sup>1</sup>, Paola Songia<sup>4</sup>, Paolo Poggio<sup>4</sup>, Stefano Carugo<sup>5</sup>, and Giulio Pompilio<sup>3,6</sup>

<sup>1</sup> Unità di Anatomia Patologica, Dipartimento di Scienze della Salute, Università degli Studi di Milano, Milan, Italy

<sup>2</sup> Struttura Complessa di Anatomia Patologica e Genetica Medica, ASST Santi Paolo e Carlo, Milan, Italy

<sup>3</sup> Unità di Biologia Vascolare e Medicina Rigenerativa, Centro Cardiologico Monzino IRCCS, Milan, Italy

<sup>4</sup> Unità per lo Studio delle Patologie Aortiche, Valvolari e Coronariche, Centro Cardiologico Monzino IRCCS, Milano, Italy

<sup>5</sup> Unità di Cardiologia, Dipartimento di Scienze della Salute, Università degli Studi di Milano, Milan, Italy

<sup>6</sup> Dipartimento di Scienze Cliniche e di Comunità, Università degli Studi di Milano, Milan, Italy

*\* equal contribution as first author*

**Short title:** SARS-CoV-2 in cardiomyocytes of COVID-19 patients

## **Corresponding author**

Gianluca Lorenzo Perrucci, PhD (ORCID: 0000-0002-4758-6040)

Unità di Biologia Vascolare e Medicina Rigenerativa

Centro Cardiologico Monzino-IRCCS

Via privata Carlo Parea, 4 - 20138 Milan, Italy

e-mail: gianluca.perrucci@ccfm.it

Tel.: +390258002754

Fax: +390258002342

## Supplementary Figures

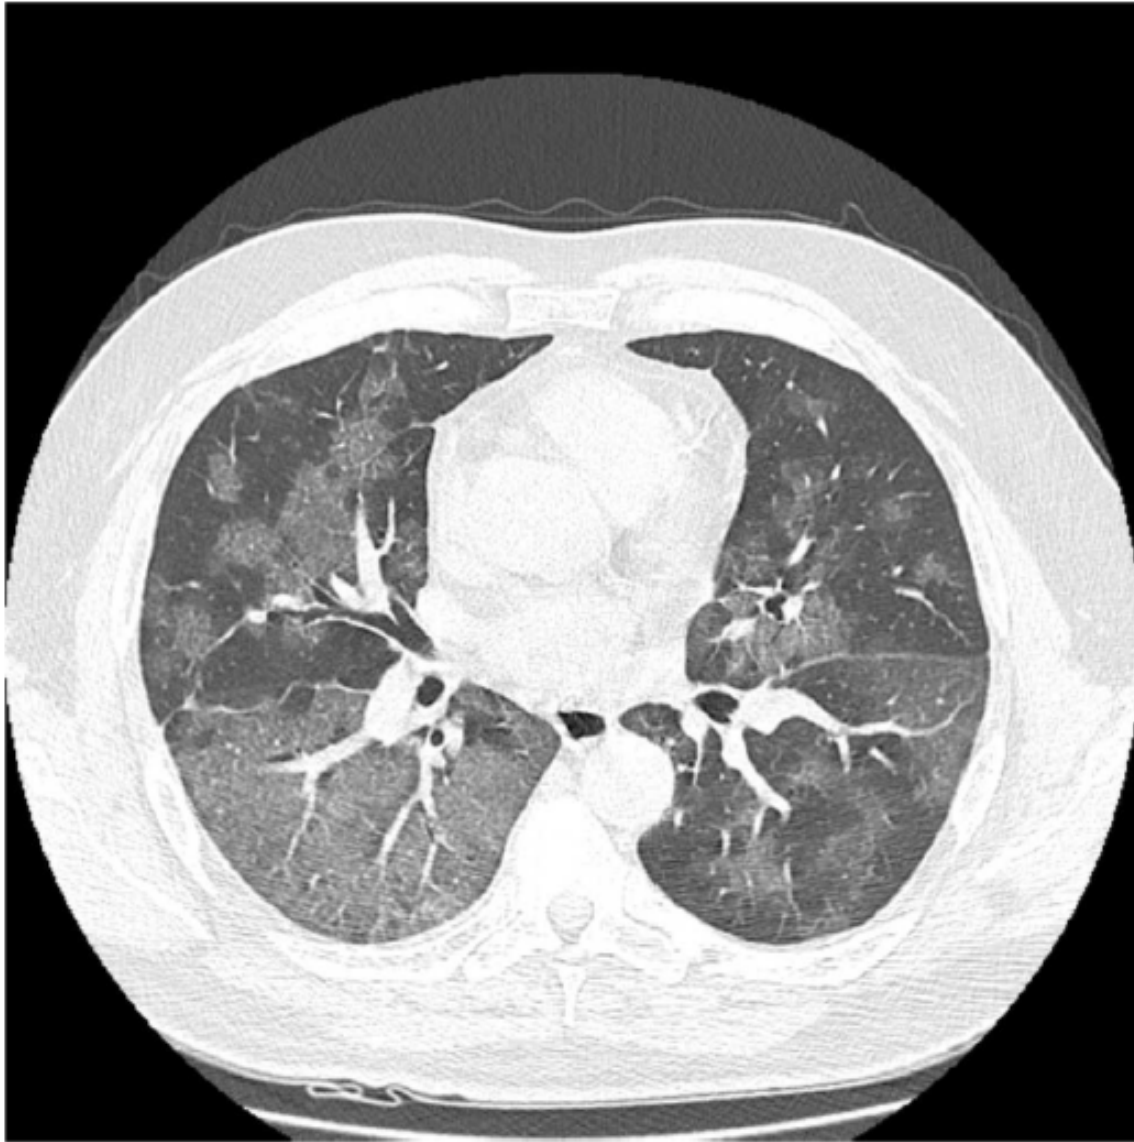

**Supplementary Figure 1 – Representative Computed Tomography image of a COVID-19 patient.** Bilateral pathognomonic lung lesion patterns typical of COVID-19 pneumonia are visible.

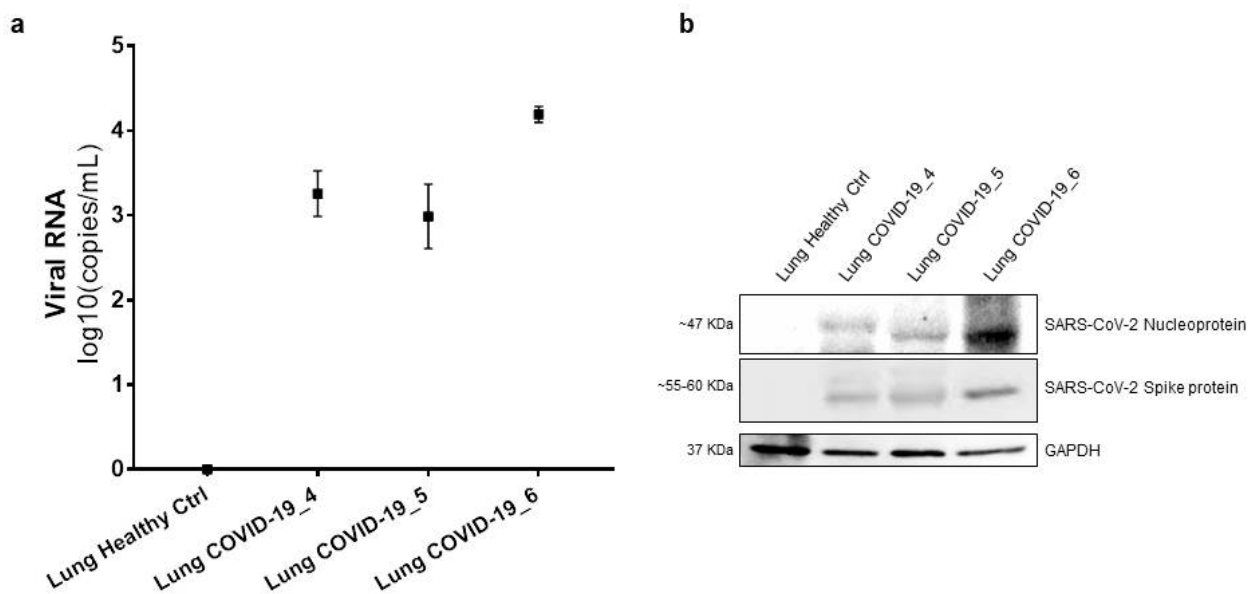

**Supplementary Figure 2 - RNA and protein of SARS-CoV-2 are present in lung samples of COVID-19 patients.** **a)** Chip-based digital PCR for SARS-CoV-2 N sequence in total RNA extracts from lung tissues of 3 out of 6 different patients. Raw expression values were expressed as log<sub>10</sub>(copies/mL). The results are expressed as median and confidence interval (CI 95%). **b)** Western blot analysis for SARS-CoV-2 nucleoprotein and spike protein on total protein extracts from lung tissues of 3 out of 6 different patients. GAPDH has been adopted as loading control.

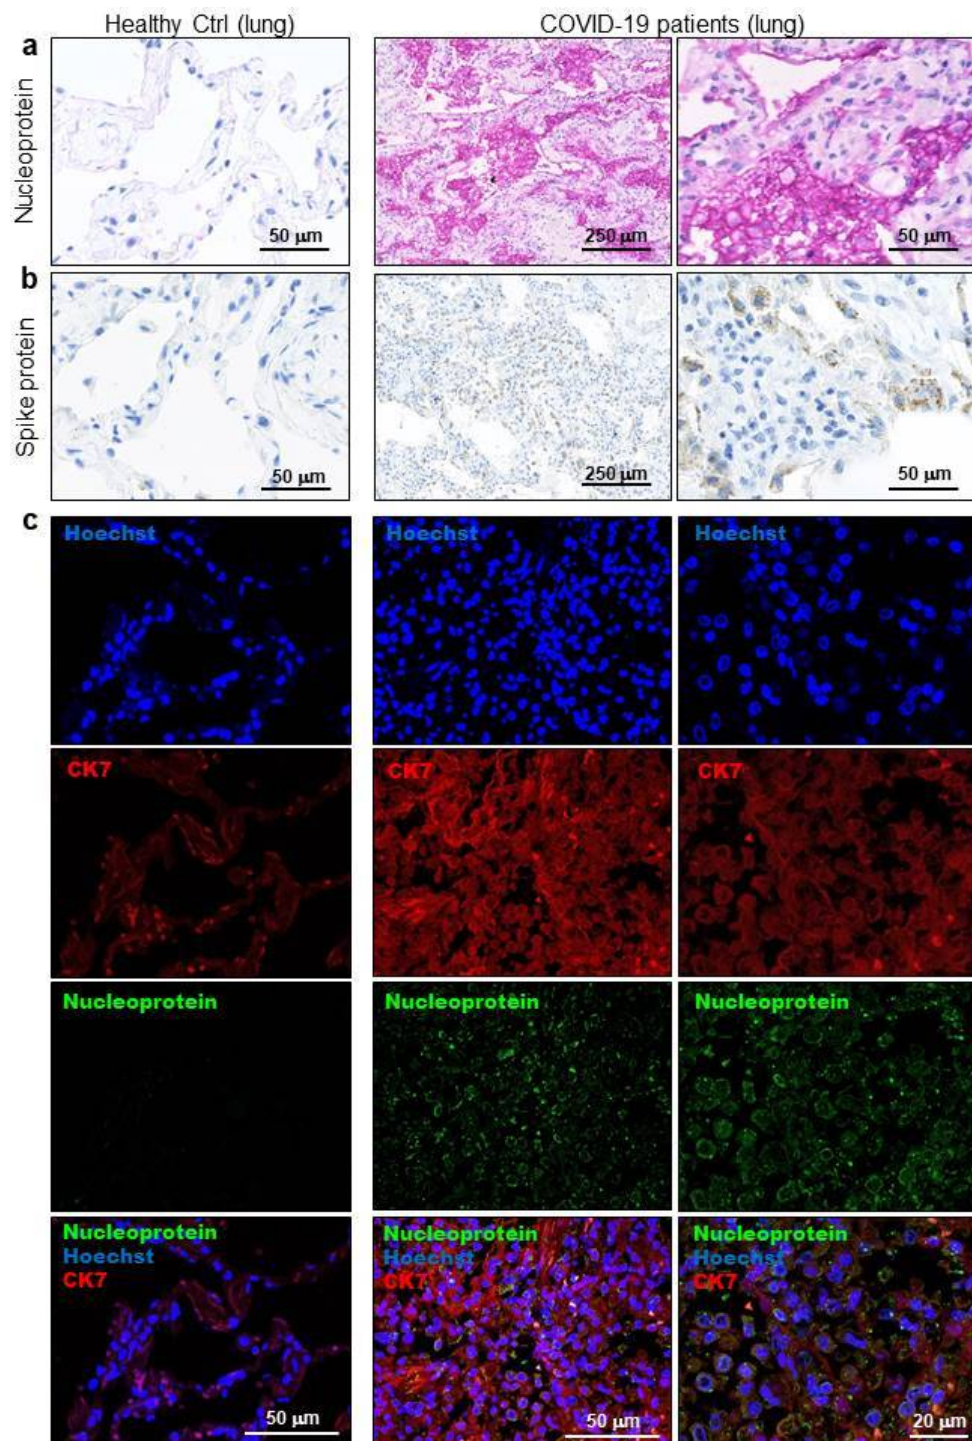

**Supplementary Figure 3 - SARS-CoV-2 proteins are detectable in lung tissue of COVID-19 patients. a- b)** Representative images of immunohistochemistry assays on 3μm-slides of formalin-fixed paraffin-embedded lung specimens from healthy control (Healthy Ctrl, left panels) and COVID-19 patients (COVID-19, central and right panels) for SARS-CoV-2 nucleoprotein (**a**, in red) and spike protein (**b**, in brown). **c)** Representative images of immunofluorescence assay on 3μm-slides of formalin-fixed paraffin-embedded lung specimens from healthy control (Healthy Ctrl, left panels) and COVID-19 patients (COVID-19, central and right panels) for SARS-CoV-2 nucleoprotein (green) and cytokeratin 7 (CK7, red). Nuclei have been stained by Hoechst (blue). Magnification as scale bars.

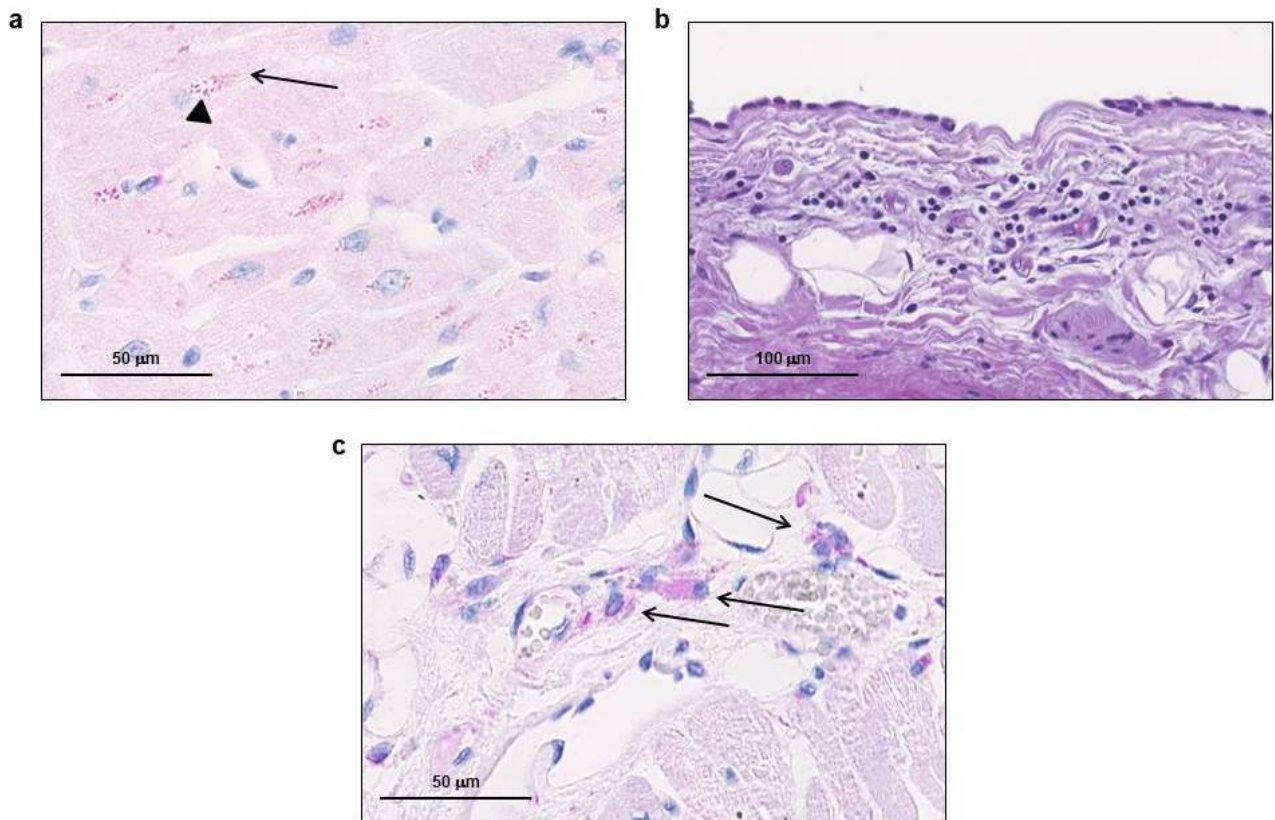

**Supplementary Figure 4 – SARS-CoV-2 nucleoprotein localization in lipofuscin granule area of cardiomyocytes and in macrophages, and inflammatory infiltrates of heart samples of COVID-19 patients.** **a)** Representative image of immunohistochemistry on 3μm-slides of formalin-fixed paraffin-embedded left ventricle specimens from COVID-19-positive patient for SARS-CoV-2 nucleoprotein. The lipofuscin granules (in light brown) are indicated with arrowhead, while viral nucleoprotein (in red), localized also in same sub-cellular area, is indicated with black arrow. **b)** Haematoxylin-eosin staining on left ventricle specimens from COVID-19-positive patient. The inflammatory infiltrate is clearly localized in sub-epicardial region. **c)** Representative image of immunohistochemistry on left ventricle specimens from COVID-19-positive patient for SARS-CoV-2 nucleoprotein (in red). The high immunoreactive interstitial macrophages are indicated with black arrows. Magnification as scale bars.

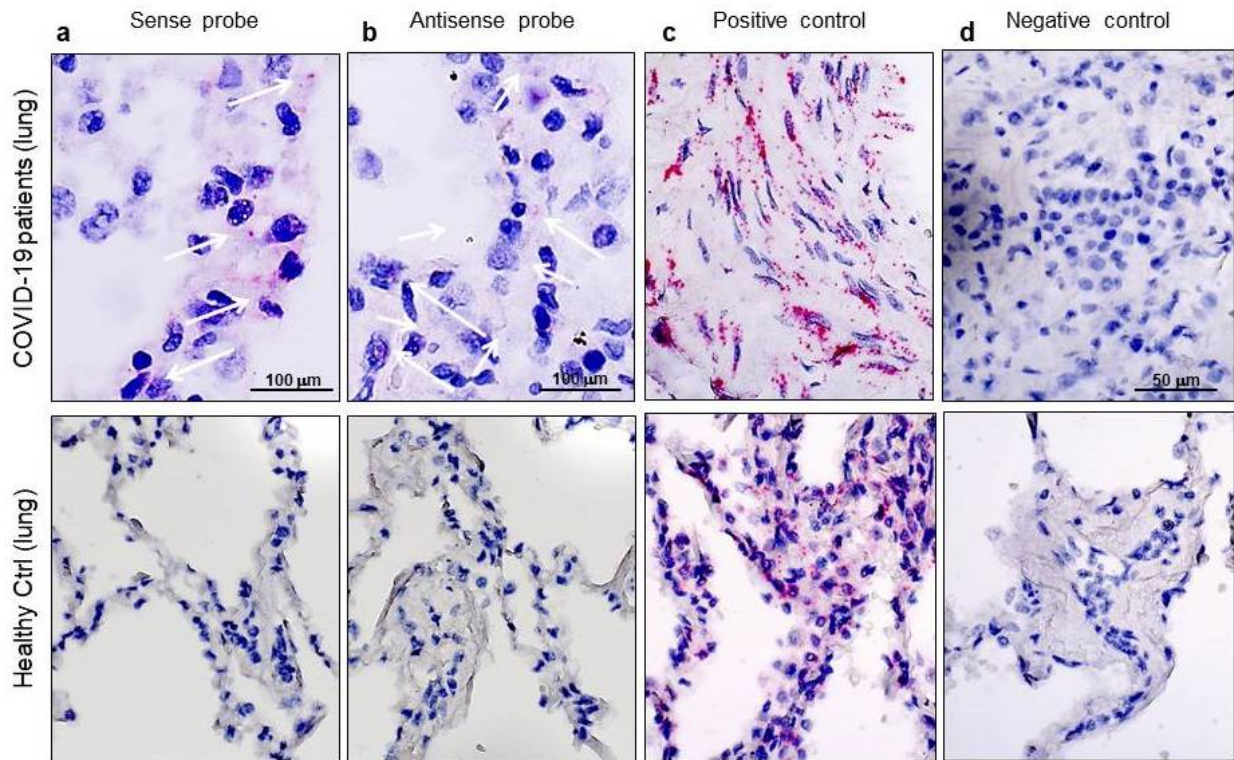

**Supplementary Figure 5 - SARS-CoV-2 sense and antisense RNA are localized in the lung specimens of COVID-19 patients.** a-b) Representative images of spatially resolved viral RNA detection by RNAScope assay on 3 $\mu$ m-slides of formalin-fixed paraffin-embedded lung specimens from COVID-19 patients (upper panels) and healthy control (Healthy Ctrl, lower panels) for SARS-CoV-2 sense (a) and antisense (b) probes for spike protein RNA sequences, as well as probes for human PPIB gene (c, positive control) and for bacterial DapB gene (d, negative control). Fast Red dots indicate viral RNA presence (white arrows). Nuclei have been counterstained with haematoxylin. Magnification as scale bars.

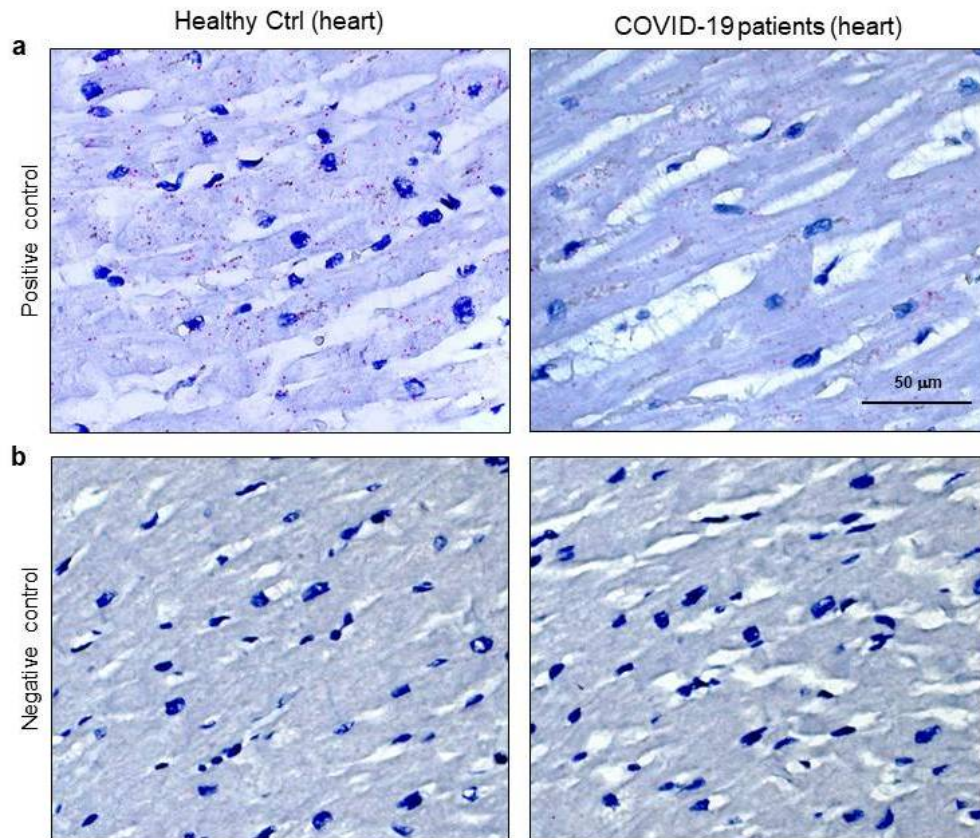

**Supplementary Figure 6 – RNAScope positive and negative controls on heart samples from healthy subject and COVID-19 patients. a-b)** Representative images of spatially resolved RNA detection by RNAScope assay on 3μm-slides of formalin-fixed paraffin-embedded left ventricle specimens from healthy control (Healthy Ctrl, left panels) and COVID-19-positive patients (right panels). The positive control probe targets human PPIB gene (**a**), while the negative control the bacterial DapB gene (**b**). Fast Red dots indicate RNA. Nuclei have been counterstained with haematoxylin. Magnification as scale bars.
